# Supplementary material for: Structure-based inhibitors of amyloid beta core suggest a common interface with tau
Source: eLife. 2019 Oct 15;8:e46924. doi: 10.7554/eLife.46924 (PMC6850776; doi:10.7554/eLife.46924)
Supplement: Figure 2—source data 1. [file elife-46924-fig2-data1.xlsx]

## Sheet: Sheet1
Figure 2A
Aβ 1μM	+10μM L1	+10μM L2	+10μM L3	+10μM L4	+10μM D1	+10μM D2
62.8575	72.7776	57.5226	67.2251	65.9314	101.233	66.6584
57.5168	63.6131	60.9285	65.2159	56.0743	100.191	61.1689
55.937	65.296	59.921	65.7196	60.8827	94.2491	76.7044
Figure 2-S1 A
DPBS	L1	L2	L3	L4	D1	D2
103.236	130.615	92.5433	112.836	102.566	102.812	101.227
94.9818	95.3939	101.668	133.254	109.75	99.5554	97.0368
101.782	94.1174	104.324	98.422	103.425	94.541	94.0774
Figure 2E
Aβ 1μM	+10μM D1	+1μM D1	+200nM D1	+100nM D1	+10μM D1b	+1μM D1b	+200nM D1b	+100nM D1b	+10μM D1d	+1μM D1d	+200nM D1d	+100nM D1d	+10μM LC	+1μM LC	+5μM D1	+5μM D1b	+5μM D1d
42.0486	95.3389	83.3836	57.8478	39.3283	98.2571	74.7924	47.2914	41.2431	102.073	80.9388	51.8348	42.847	33.1762	41.5394	91.1486	87.1983	110.362
42.7481	96.9287	81.0024	64.744	44.3238	101.083	76.5319	53.043	41.3986	109.697	87.298	58.0951	45.3625	35.1209	40.7938	96.9729	94.4764	97.9227
37.4346	96.2928	74.5655	67.9943	41.7236	109.725	78.3689	45.207	41.4692	107.337	83.8923	54.9296	38.5369	37.7652	37.8036	74.5905	92.1461	102.042
42.6563
40.4871
42.522
Figure 2-S1 C
Aβ 1μM	+1μM D1	+10μM D1	+1μM D1a	+10μM D1a	+1μM D1b	+10μM D1b	+1μM D1c	+10μM D1c	+1μM D1d	+10μM D1d	+1μM D1e	+10μM D1e	+1μM D1f	+10μM D1f
53.1542	88.5804	105.589	74.9734	100.879	104.46	110.11	58.3293	95.9233	116.009	106.783	90.4486	114.95	89.1448	106.308
50.0522	86.5823	91.4576	88.2407	100.984	92.3468	111.498	67.1458	109.795	90.1439	94.6546	92.047	99.7247	90.0589	112.812
51.5857	87.2666	112.153	75.343	96.9873	84.0347	108.501	62.4903	107.228	89.2647	87.926	82.4312	90.2737	90.5735	106.888
Figure 2-S1 B
DPBS	D1	D1a	D1b	D1c	D1d	D1e	D1f	DMSO	LC
115.669	100.811	97.891	88.0928	101.1	120.129	87.7344	130.291	0.941311	100.919
96.709	104.769	92.9651	94.4894	95.7998	98.5756	87.6649	94.4092	0.871782	120.279
87.6221	114.931	83.9478	85.2475	98.2226	91.2804	106.331	93.0133	1.35313	119.192
