# Supplementary material for: Structure-based inhibitors of amyloid beta core suggest a common interface with tau
Source: eLife. 2019 Oct 15;8:e46924. doi: 10.7554/eLife.46924 (PMC6850776; doi:10.7554/eLife.46924)
Supplement: Figure 3—source data 1. [file elife-46924-fig3-data1.xlsx]

## Sheet: Sheet1
Figure 3- S2A
Abeta			D1			D1b			D1d			LC
6 hrs.	24 hrs.	72 hrs.	6 hrs.	24 hrs.	72 hrs.	6 hrs.	24 hrs.	72 hrs.	6 hrs.	24 hrs.	72 hrs.	6 hrs.	24 hrs.	72 hrs.
139146	123041	108805	36828	46242	37153	8524	19235	19363	56458	48595	60520	153210	143937	117598
110962	128428	111580	76261	54983	36627	25983	35509	22486	55181	34304	41804	108698	119507	120803
141320	123711	123158	41044	72116	29395	7971	12753	27496	16745	55785	21810	136533	157566	108328
