# Supplementary material for: Structure-based inhibitors of amyloid beta core suggest a common interface with tau
Source: eLife. 2019 Oct 15;8:e46924. doi: 10.7554/eLife.46924 (PMC6850776; doi:10.7554/eLife.46924)
Supplement: Figure 4—source data 1. [file elife-46924-fig4-data1.xlsx]

## Sheet: Sheet1
Figure 4A
Aβ 1uM	+10μM D1	+5μM D1	+1μM D1	+500nM D1	+10μM D1b	+5μM D1b	+1μM D1b	+500nM D1b	+10μM D1d	+5μM D1d	+1μM D1d	+500nM D1d	+10μM LC	+1μM LC	SDS
31.2182	55.3843	48.9468	39.5782	28.878	92.3228	45.6246	31.557	28.8622	98.5318	88.7062	71.294	36.7022	33.9129	42.0602	0.977045
47.3236	54.5569	43.8725	31.8091	25.5292	93.552	51.9196	38.483	27.7197	100.872	93.1581	77.9076	36.1901	40.4134	33.6214	1.0716
37.7738	53.3829	41.2486	33.6686	32.5734	107.743	56.2393	35.9064	30.8005	95.7346	80.0389	76.0917	39.8461	38.1126	40.3189	1.02432
29.6344
37.0331
30.4145
