# Supplementary material for: Structure-based inhibitors of amyloid beta core suggest a common interface with tau
Source: eLife. 2019 Oct 15;8:e46924. doi: 10.7554/eLife.46924 (PMC6850776; doi:10.7554/eLife.46924)
Supplement: Figure 5—source data 1. [file elife-46924-fig5-data1.xlsx]

## Sheet: Sheet1
Figure 5 B, D
+250nM D1	+1μM D1	+5μM D1	+20μM D1	+50μM D1	+75μM D1	+250nM D1b	+1μM D1b	+5μM D1b	+20μM D1b	+50μM D1b	+75μM D1d	+250nM D1d	+1μM D1d	+5μM D1d	+20μM D1d	+50μM D1d	+75μM D1d	+5μM LC	+20μM LC	+50μM LC	+20μM LC	+50μM LC	+75μM LC		Tau40 seeds	Vehicle	Aβ seeds
1536.28	2520.38	2988.05	167.79	505.13	2527.95	954.36	504.56	68.91	130.84	433.5	992.93	2886.22	3577.87	3476.74	99.77	212.95	323.93	2989.62	2620.43	3476.61	3804.49	4828.65	3751.69		60543.8	5.6	2003.45
1299.59	1764.88	3780.98	142.66	1765.09	878.87	1406.5	537.46	72.97	82.34	220.02	449.66	2808.65	2977	3546.32	70.49	276.11	513.58	2798.92	2750.04	4005.49	3632.68	4382.63	5359.67		59641.6	9.08	1386.84
1630.2	2386.81	3756.25	108.16	1465.11	2011.35	1226.63	266.59	128.14	149.81	116.61	364.56	3072.49	2807.44	3459.29	85.48	241.55	421.31	2382.35	2591.77	3546.24	2632.04	5195.2	5812.5		57938.8	21.75	1241.85
Figure 5-S1 D
hIAPP			Tau k18+			TDP43			α-syn			TTR			Vehicle			Aβ oligomer			Aβ monomer
Mean	STD	repeats	Mean	STD	repeats	Mean	STD	repeats	Mean	STD	repeats	Mean	STD	repeats	Mean	STD	repeats	Mean	STD	repeats	Mean	STD	repeats
51.5299	29.7865	3	107134	11168.5	3	43.4125	21.4827	3	126.856	65.337	3	39.8069	15.8019	3	51.137	19.61	3	47.8973	12.414	3	46.5925	3.86636	3
Figure 5-S2A
Aβ WT seeds	NO SEED	Aβ 17/19 seeds	Aβ 17/19 +250nM D1b	Aβ 17/19 +1μM D1b	Aβ 17/19 +5μM D1b	Aβ 17/19 +20μM D1b	Aβ 17/19 +50μM D1b	Aβ 16/18/22 seeds	Aβ 16/18/22 +0.25μM D1b	Aβ 16/18/22 +1μM D1b	Aβ 16/18/22 +5μM D1b	Aβ 16/18/22 +20μM D1b	Aβ 16/18/22 +50μM D1b
94.6369	13.6178	137.072	75.394	19.6794	54.9811	21.9438	180.107	4.45488	25.2489	40.4012	28.9083	243.265	68.6532
151.079	7.99817	186.131	40.0122	63.0479	13.7867	39.4475	177.828	12.2734	10.2141	25.436	79.2487	294.97	186.992
170.5	21.8441	86.6773	111.716	32.6768	13.0728	20.4023	42.5288	4.4841	18.4162	21.764	79.6671	201.909	65.6419
