# Supplementary material for: Structure-based inhibitors of amyloid beta core suggest a common interface with tau
Source: eLife. 2019 Oct 15;8:e46924. doi: 10.7554/eLife.46924 (PMC6850776; doi:10.7554/eLife.46924)
Supplement: Figure 6—source data 1. [file elife-46924-fig6-data1.xlsx]

## Sheet: Sheet1
Figure 6B
No Inhibitor	+250nM D1	+1μM D1	+5μM D1	+20μM D1	+50μM D1	+75μM D1	+250nM D1b	+1μM D1b	+5μM D1b	+20μM D1b	+50μM D1b	+75μM D1b	+250nM D1d	+1μM D1d	+5μM D1d	+20μM D1d	+50μM D1d	+75μM D1d	+5μM LC	+75μM LC	vehicle
51426.6	58437	49698.1	51513.6	53077.9	25740.7	13582.6	68106	78770.2	28638.8	6649.01	5160.65	1300.06	61720.1	68919.5	42401.6	53955.6	52347.8	13437.2	45308.1	68834.6	3746.07
38345.2	38285	37718.4	36162.8	38567.6	13466.2	12192.2	51788	68635.9	15449.2	4239.42	4296.07	958.107	45412.4	48074.1	34804.7	42721.1	52653.7	13013.1	30329.9	61701.3	5263.05
42262.3	47301.1	38568.2	32994	40694.1	16790.5	13382.9	52871.3	68098.8	18417.3	4612.62	3540.17	1292.14	43963	59781.6	29554.1	40402	65287	13533	33012.6	57423.7	2350.03
Figure 6D, Figure 6-S2 CDE
Mutant 1
no inhibitor	+250nM D1b	+1μM D1b	+5μM D1b	+20μM D1b	+50μM D1b	+75μM D1b		+5μM LC	+20μM LC	+50μM LC
52453	35052.7	23873.4	10239.7	2180.36	3017.2	4161.55		75582	45411.7	32828
45258.8	42390.9	32591.4	10711.7	1934.68	4224.38	4265.02		53331.6	52725.1	39052.1
37204.9	40404.4	36087.1	9431.12	1688.88	10228.3	7316.81		49542.4	49728.1	42581.2
Mutant 2
no inhibitor	+250nM D1b	+1μM D1b	+5μM D1b	+20μM D1b	+50μM D1b	+75μM D1b		+5μM LC	+20μM LC	+50μM LC
4516.58	5824.02	11033.9	3988.12	3589.56	675.129	671.921		8661.59	8800.26	15808.3
6097.32	3785.02	7895.08	7868.8	3887.76	414.296	1239.8		8774.4	8416.28	12082.4
2831.04	5644.88	6776.67	8904.18	3290.11	1222.28	1575.73		6266.26	7198.54	7477.93
Mutant 3
no inhibitor	+250nM D1b	+1μM D1b	+5μM D1b	+20μM D1b	+50μM D1b	+75μM D1b		+5μM LC	+20μM LC	+50μM LC
9187.12	5087.37	4194.66	3436.01	7399.7	3825.28	7123.98		45957.5	55135.5	63180.6
13887.2	8245.76	3619.72	4742.66	2874.34	1112.62	7220.61		31313.1	15007.8	5777.62
6860.18	6540.65	8956.09	2284.24	2990.18	3849.58	7286.41		22293.4	21024.5	15132.6
Mutant 4
no inhibitor	+250nM D1b	+1μM D1b	+5μM D1b	+20μM D1b	+50μM D1b	+75μM D1b		+5μM LC	+20μM LC	+50μM LC
44528.8	74330.1	69059.3	45531	38655.3	12260.7	8076		73644.1	69753.1	50650.8
38869.7	69265.2	56023.6	37728.8	31956.9	13064	8492.29		69834.8	62913.1	46647.3
49842.2	65174.4	60981.6	41463.2	32687.9	16506	8324.46		69832	64223	43261.5
Mutant 5
no inhibitor	+250nM D1b	+1μM D1b	+5μM D1b	+20μM D1b	+50μM D1b	+75μM D1b		+5μM LC	+20μM LC	+50μM LC
9495.62	11757.6	11269	628.595	69.542	227.076	306.864		32401.5	28849.3	33060.9
8046.03	9922.14	11835.8	488.916	175.637	254.031	506.299		26810.3	33554.2	38098
8660.54	10478.8	12473.7	581.31	73.1921	168.739	532.19		27381.6	22770.6	28025.3
3R
no inhibitor	+250nM D1b	+1μM D1b	+5μM D1b	+20μM D1b	+50μM D1b	+75μM D1b		+5μM LC	+20μM LC	+50μM LC
10948.8	13904.8	17331.3	3631.45	443.807	674.244	744.04		12600.7	12100.3	12789.3
13766	10978.8	14129.9	3003.34	289.335	887.512	887.819		7626.47	12649.7	9938.61
14090.9	5918.89	11056.2	1880.59	282.723	362.532	1739.18		10516.5	9435.2	11806.9
WT	Null Mutant	Vehicle
86085.6	729.606	746.07
67872.6	1109.98	1263.05
79505.8	1059.88	850.03
