# Supplementary material for: Structure-based inhibitors of amyloid beta core suggest a common interface with tau
Source: eLife. 2019 Oct 15;8:e46924. doi: 10.7554/eLife.46924 (PMC6850776; doi:10.7554/eLife.46924)
Supplement: Figure 7—source data 1. [file elife-46924-fig7-data1.xlsx]

## Sheet: Sheet1
Figure 7A
PSP
Seed	+D1	+D1b	+D1d	+LC
8193	2866.52	1200.97	4216.65	7702
8554.34	3835.45	668.79	5546.26	7662.64
7928.11	5180.54	939.79	3363.89	6259.9
AD- Frontal Cortex
Seed	+D1	+D1b	+D1d	+LC
17387.2	12544.1	4641.34	21370.6	22348.2
18634	9750.47	4784.51	21457.2	17419.1
14047.3	10655.8	5828.96	23488.7	17009.3
AD- Occipital Lobe
Seed	+D1	+D1b	+D1d	+LC
7064.54	7401.01	1317.61	3010.39	4805.11
8664.76	7418.47	1033.35	3911.85	5140.2
9511.13	6596.78	1412.15	4350.53	7444.56
AD- Hippocampus
Seed	+D1	+D1b	+D1d	+LC
55023.2	37061.3	24844.1	54356.3	41190
47153.5	36077.6	16827.3	71238.8	44379.8
48573.4	30196.5	22625.6	67273.2	51804.8
No Seed	neg cntl	immuno-dep
88.66	563.92	240.234
87.33	375.95	189.229
79.43	425.01	175.554
